# Supplementary material for: Molecular diversity of α-gliadin expressed genes in genetically contrasted spelt (Triticum aestivum ssp. spelta) accessions and comparison with bread wheat (T. aestivum ssp. aestivum) and related diploid Triticum and Aegilops species
Source: PubMed Central journal article supplement (PMC5104789; doi:10.1007/s11032-016-0569-5), 2016-11-10
Supplement: 11032_2016_569_MOESM1_ESM.pdf [file 11032_2016_569_MOESM1_ESM.pdf]

# Molecular diversity of $\alpha$ -gliadin expressed genes in genetically contrasted spelt (*Triticum aestivum* ssp. *spelta*) accessions and comparison with bread wheat (*T. aestivum* ssp. *aestivum*) and related diploid *Triticum* and *Aegilops* species

## Molecular Breeding

Benjamin Dubois<sup>1,2</sup>, Pierre Bertin<sup>2</sup>, Dominique Mingeot<sup>1</sup>

<sup>1</sup> Centre wallon de Recherches agronomiques (CRA-W), Département Sciences du vivant, Chaussée de Charleroi, 234, 5030 Gembloux, Belgium

<sup>2</sup> Université catholique de Louvain (UCL), Earth and Life Institute – Agronomy, Croix du Sud, 2 bte L7.05.11, 1348 Louvain-la-Neuve, Belgium

Corresponding author: Benjamin Dubois, b.dubois@cra.wallonie.be

### Online Resource 1. Passport data of the 85 spelt accessions submitted to a genetic assignment method analysis with Structure software.

| Provenance area     | Provenance country | Name <sup>1</sup> | Accession number | Accession Name      | Germplasm <sup>2</sup>            |
|---------------------|--------------------|-------------------|------------------|---------------------|-----------------------------------|
| Africa              | Western Sahara     | SAH01             | CGN08284         | Sahara I            | CGN (Wageningen, The Netherlands) |
| America             | Mexico             | MEX01             | PI520066         | 26867-302y-300m-oy  | USDA (Washington, USA)            |
|                     | USA                | US02              | PI168681         | White spring        | USDA (Washington, USA)            |
|                     |                    | US06              | PI355595         | 69Z5,73             | USDA (Washington, USA)            |
| Eastern Europe      | Bulgaria           | BUL01             | PI295059         | Deutschland         | USDA (Washington, USA)            |
|                     |                    | BUL02             | PI295061         | Ungarn              | USDA (Washington, USA)            |
|                     |                    | BUL03             | PI295062         | Italien             | USDA (Washington, USA)            |
|                     |                    | BUL04             | PI295063         | Ungarn              | USDA (Washington, USA)            |
|                     | Czech Republic     | CZE01             | RICP 01c0100920  | (svetla)            | CRI (Prague, Czech Republic)      |
|                     |                    | CZE02             | RICP 01c0100921  | (tmava)             | CRI (Prague, Czech Republic)      |
|                     |                    | CZE06             | RICP 01c0200982  | spalda bila jarni   | CRI (Prague, Czech Republic)      |
|                     |                    | CZE07             | RICP 01c0200983  |                     | CRI (Prague, Czech Republic)      |
|                     | Hungary            | CZE08             | RICP 01c0201257  | (ruzyne)            | CRI (Prague, Czech Republic)      |
|                     |                    | HUN01             | PI272574         | I-1-3540            | USDA (Washington, USA)            |
|                     |                    | HUN02             | PI272579         | I-1-3530            | USDA (Washington, USA)            |
|                     | Macedonia          | HUN03             | PI290514         | White spelt         | USDA (Washington, USA)            |
|                     |                    | MAC01             | PI378469         | 1744                | USDA (Washington, USA)            |
|                     | Poland             | POL01             | PI192717         | Dankowska graniatka | USDA (Washington, USA)            |
|                     | Romania            | ROM01             | PI306554         | 2947                | USDA (Washington, USA)            |
|                     | Ukraine            | UKR01             | K 19372          |                     | VIR (Saint-Petersburg, Russia)    |
| Northwestern Europe | Austria            | AUS01             |                  | Ebners rotkorn      |                                   |
| Europe              | Belgium            | BEL02             |                  | Franckenkorn        | CRA-W (Gembloux, Belgium)         |
|                     |                    | BEL04             |                  | Redouté             | CRA-W (Gembloux, Belgium)         |
|                     |                    | BEL06             | PI348303         | 69Z6,472            | USDA (Washington, USA)            |
|                     |                    | BEL07             | PI348312         | 69Z6,482            | USDA (Washington, USA)            |
|                     |                    | BEL08             | PI348315         | 69Z6,485            | USDA (Washington, USA)            |
|                     |                    | BEL09             | PI348329         | 69Z6,499            | USDA (Washington, USA)            |
|                     |                    | BEL10             | PI348334         | 69Z6,505            | USDA (Washington, USA)            |
|                     |                    | BEL12             | PI348366         | 69Z6,538            | USDA (Washington, USA)            |
|                     |                    | BEL13             | PI348409         | 69Z6,582            | USDA (Washington, USA)            |
|                     |                    | BEL14             | PI348417         | 69Z6,590            | USDA (Washington, USA)            |
|                     | Denmark            | DK01              | PI361811         | DN-2267             | USDA (Washington, USA)            |
|                     |                    | DK02              | PI361812         | DN-2268             | USDA (Washington, USA)            |
|                     | Germany            | GER08             | PI348033         | 69Z6,191            | USDA (Washington, USA)            |
|                     |                    | GER09             | PI348040         | 69Z6,198            | USDA (Washington, USA)            |

|                     |                |         |            |                            |                                        |
|---------------------|----------------|---------|------------|----------------------------|----------------------------------------|
|                     |                | GER10   | PI348056   | 69Z6,215                   | USDA (Washington, USA)                 |
|                     |                | GER11   | PI348114   | 69Z6,275                   | USDA (Washington, USA)                 |
|                     |                | GER12   | PI348120   | 69Z6,282                   | USDA (Washington, USA)                 |
|                     |                | GER15   | PI348159   | 69Z6,322                   | USDA (Washington, USA)                 |
|                     |                | GER16   | PI348168   | 69Z6,332                   | USDA (Washington, USA)                 |
|                     |                | GER17   | PI348171   | 69Z6,335                   | USDA (Washington, USA)                 |
|                     |                | GER19   | PI355552   | T2                         | USDA (Washington, USA)                 |
|                     |                | GER21   | PI355677   | BP 2                       | USDA (Washington, USA)                 |
|                     |                | GER22   | TRI3445    | Blauer Samtiger            | IPK (Gatersleben, Germany)             |
|                     |                | GER23   | TRI1259    | Rottweiler Frühkorn St. I  | IPK (Gatersleben, Germany)             |
|                     |                | GER25   | TRI 303    | Kipperhaus Weisser Spelz   | IPK (Gatersleben, Germany)             |
|                     | Sweden         | SWE01   | NGB 4495   | Speltvete FR Gotland       | NGB (Alnarp, Sweden)                   |
|                     |                | SWE02   | CGN08300   |                            | CGN (Wageningen, The Netherlands)      |
|                     | Switzerland    | SWI02   |            | Balmegg                    |                                        |
|                     |                | SWI10   | RAC TS2113 | SCHNOTTWILER WEISSKORN 35  | Agroscope Changins (Nyon, Switzerland) |
|                     |                | SWI11   | RAC TS2145 | Thuerig rotkorn Th4        | Agroscope Changins (Nyon, Switzerland) |
|                     |                | SWI12   | RAC TS2144 | Hueslen rotkorn            | Agroscope Changins (Nyon, Switzerland) |
|                     |                | SWI13   | RAC TS2117 | Neuegger weisskorn Ngg42   | Agroscope Changins (Nyon, Switzerland) |
|                     |                | SWI18   | RAC TS2116 | Willisauer weisskorn Wil17 | Agroscope Changins (Nyon, Switzerland) |
|                     |                | SWI20   | PI347904   | 69Z6,57                    | USDA (Washington, USA)                 |
|                     |                | SWI21   | PI347913   | 69Z6,66                    | USDA (Washington, USA)                 |
|                     |                | SWI23   | PI347939   | 69Z6,93                    | USDA (Washington, USA)                 |
|                     |                | SWI24   | PI347950   | 69Z6,105                   | USDA (Washington, USA)                 |
|                     |                | SWI25   | PI348004   | 69Z6,161                   | USDA (Washington, USA)                 |
|                     |                | SWI27   | PI355560   | SK1B                       | USDA (Washington, USA)                 |
|                     |                | SWI28   | PI355573   | SK3F                       | USDA (Washington, USA)                 |
|                     |                | SWI31   | PI355653   | Rottweiller Fruhkorn 4     | USDA (Washington, USA)                 |
|                     | United Kingdom | UK01    | PI355704   | 69Z5,194                   | USDA (Washington, USA)                 |
| Southwestern Europe | Italy          | ITA01   | PI355642   | 69Z5,122                   | USDA (Washington, USA)                 |
|                     | Spain          | SPA01   | PI348526   | 69Z6,704                   | USDA (Washington, USA)                 |
|                     |                | SPA02   | PI348537   | 69Z6,715                   | USDA (Washington, USA)                 |
|                     |                | SPA03   | PI348572   | 69Z6,752                   | USDA (Washington, USA)                 |
|                     |                | SPA04   | PI348580   | 69Z6,760                   | USDA (Washington, USA)                 |
|                     |                | SPA05   | PI348588   | 69Z6,768                   | USDA (Washington, USA)                 |
|                     |                | SPA06   | PI348651   | 69Z6,834                   | USDA (Washington, USA)                 |
|                     |                | SPA08   | PI348688   | 69Z6,872                   | USDA (Washington, USA)                 |
|                     |                | SPA09   | PI348716   | 69Z6,900                   | USDA (Washington, USA)                 |
|                     |                | SPA10   | PI348723   | 69Z6,908                   | USDA (Washington, USA)                 |
|                     |                | SPA11   | PI348766   | 69Z6,953                   | USDA (Washington, USA)                 |
|                     |                | SPA13   | PI348463   | 69Z6,638                   | USDA (Washington, USA)                 |
| Middle East         | Afghanistan    | AFG04   | PI367202   | 625                        | USDA (Washington, USA)                 |
|                     | Tajikistan     | TAD01   | K 52443    |                            | VIR (Saint-Petersburg, Russia)         |
|                     |                | TAD06   | K 52437    |                            | VIR (Saint-Petersburg, Russia)         |
|                     |                | TAD07   | K 52442    |                            | VIR (Saint-Petersburg, Russia)         |
|                     |                | TAD15   | K 52463    |                            | VIR (Saint-Petersburg, Russia)         |
|                     |                | TAD22   | K 56568    |                            | VIR (Saint-Petersburg, Russia)         |
| Near East           | Azerbaijan     | AZE02   | K 45364    |                            | VIR (Saint-Petersburg, Russia)         |
|                     |                | AZE03   | K 45368    |                            | VIR (Saint-Petersburg, Russia)         |
|                     | Iran           | IRA03   | CGN12270   | Iran 416A                  | CGN (Wageningen, The Netherlands)      |
|                     |                | Iran77d | CGN06533   | Iran 77d                   | USDA (Washington, USA)                 |

<sup>1</sup> : Names used for the same accessions in Bertin et al. (2004) except for Iran77d, which was named as in Dvorak et al. (2012).

<sup>2</sup> : USDA = United States Department of Agriculture; VIR = Vavilov Institute of Plant Genetic Resources; CRI = Crop Research Institute;

IPK = Institute of Plant Genetics and Crop Plant Research; CGN = Center for Genetic Resources; CRA-W = Centre wallon de Recherches agronomiques; NGB = Nordic Gene Bank.
