# Supplementary material for: Molecular diversity of α-gliadin expressed genes in genetically contrasted spelt (Triticum aestivum ssp. spelta) accessions and comparison with bread wheat (T. aestivum ssp. aestivum) and related diploid Triticum and Aegilops species
Source: PubMed Central journal article supplement (PMC5104789; doi:10.1007/s11032-016-0569-5), 2016-11-10
Supplement: 11032_2016_569_MOESM2_ESM.pdf [file 11032_2016_569_MOESM2_ESM.pdf]

# Molecular diversity of $\alpha$ -gliadin expressed genes in genetically contrasted spelt (*Triticum aestivum* ssp. *spelta*) accessions and comparison with bread wheat (*T. aestivum* ssp. *aestivum*) and related diploid *Triticum* and *Aegilops* species

## Molecular Breeding

Benjamin Dubois<sup>1,2</sup>, Pierre Bertin<sup>2</sup>, Dominique Mingeot<sup>1</sup>

<sup>1</sup> Centre wallon de Recherches agronomiques (CRA-W), Département Sciences du vivant, Chaussée de Charleroi, 234, 5030 Gembloux, Belgium

<sup>2</sup> Université catholique de Louvain (UCL), Earth and Life Institute – Agronomy, Croix du Sud, 2 bte L7.05.11, 1348 Louvain-la-Neuve, Belgium

Corresponding author: Benjamin Dubois, b.dubois@cra.wallonie.be

**Online Resource 2. (a) List of  $\alpha$ -gliadin sequences from ancestral diploid species and from bread wheat used to confirm the genome assignments. (b) List of additional  $\alpha$ -gliadin sequences from bread wheat used to conduct an overall phylogenetic analysis together with  $\alpha$ -gliadin sequences from bread wheat and diploid species included in the Online Resource 2a and with spelt  $\alpha$ -gliadins isolated in this work.**

| a      |                                                             |                                                                                                                                                      |                           |
|--------|-------------------------------------------------------------|------------------------------------------------------------------------------------------------------------------------------------------------------|---------------------------|
| Genome | Species                                                     | Accession number                                                                                                                                     | Reference                 |
| A      | <i>T. urartu</i>                                            | KP405293, KP405294, KP405295, KP405296, KP405297, KP405298, KP405299, KP405301, KP405302, KP405303, KP405304, KP405305, KP405306, KP405307, KP405308 | Ozuna et al. 2015         |
|        | var. Cheyenne                                               | U08287                                                                                                                                               | Blechl and Anderson 1994* |
|        | <i>T. aestivum</i> ssp. <i>aestivum</i> var. Cheyenne       | U50984, U51306, U51307                                                                                                                               | Anderson et al. 1997      |
|        | var. Chinese Spring                                         | AB982242, AB982245, AB982249, AB982255, AB982272, AB982277, AB982278, AB982281, AB982288                                                             | Noma et al. 2015          |
| S/B    | <i>Ae. speltooides</i>                                      | DQ002584, DQ002585, DQ002586, DQ002587, DQ002588                                                                                                     | Van Herpen et al. 2006    |
|        | var. Cheyenne                                               | K02068                                                                                                                                               | Kasarda et al. 1984       |
|        | var. Cheyenne                                               | M11073                                                                                                                                               | Okita et al. 1985         |
|        | <i>T. aestivum</i> ssp. <i>aestivum</i> var. Cheyenne       | U51303                                                                                                                                               | Anderson et al. 1997      |
|        |                                                             | X02540                                                                                                                                               | Sumner-Smith et al. 1985  |
|        | var. Chinese Spring                                         | AB982234, AB982236, AB982237, AB982241, AB982267, AB982273, AB982285, AB982286                                                                       | Noma et al. 2015          |
| D      | <i>Ae. tauschii</i>                                         | DQ002589, DQ002590, DQ002591, DQ002592, DQ002593, DQ002594, DQ002595, DQ002596, DQ002597, DQ002598, DQ002599                                         | Van Herpen et al. 2006    |
|        | var. Cheyenne                                               | M11075                                                                                                                                               | Okita et al. 1985         |
|        | <i>T. aestivum</i> ssp. <i>aestivum</i> var. Chinese Spring | X17361                                                                                                                                               | Garcia-Maroto et al. 1990 |
|        |                                                             | AB982248, AB982253, AB982256, AB982260, AB982265, AB982276, AB982279, AB982284, AB982293                                                             | Noma et al. 2015          |
|        | var. Chinese Spring                                         |                                                                                                                                                      |                           |
| b      |                                                             |                                                                                                                                                      |                           |
|        | <i>T. aestivum</i> ssp. <i>aestivum</i> var. Mjølner        | AJ133602, AJ133604, AJ133605, AJ133612                                                                                                               | Arentz-Hansen et al. 2000 |
|        | <i>T. aestivum</i> ssp. <i>aestivum</i> var. Jimai20        | JN831386                                                                                                                                             | Li and Li 2011*           |
|        | <i>T. aestivum</i> ssp. <i>aestivum</i> var. Zhengmai9023   | KC715927, KC715929, KC715930, KC715932, KC715940, KC715941, KC715944, KC715945, KC715950, KC715951, KC715952, KC715953                               | Li et al. 2013*           |
|        | <i>T. aestivum</i> ssp. <i>aestivum</i> var. Zhengmai9023   | JX828270                                                                                                                                             | Li et al. 2012*           |
|        | <i>T. aestivum</i> ssp. <i>aestivum</i> var. C273           | KJ410475                                                                                                                                             | Kaur et al.2016           |
|        | <i>T. aestivum</i> ssp. <i>aestivum</i> var. GW273          | KJ410476                                                                                                                                             | Kaur et al.2016           |
|        | <i>T. aestivum</i> ssp. <i>aestivum</i> var. HI617          | KJ410477                                                                                                                                             | Kaur et al.2016           |

|                                                       |                                                             |                                                                                                                                                                                                                                                          |                          |
|-------------------------------------------------------|-------------------------------------------------------------|----------------------------------------------------------------------------------------------------------------------------------------------------------------------------------------------------------------------------------------------------------|--------------------------|
| A, B, D                                               | <i>T. aestivum</i> ssp. <i>aestivum</i> var. Hyb65          | KJ410478                                                                                                                                                                                                                                                 | Kaur et al.2016          |
|                                                       | <i>T. aestivum</i> ssp. <i>aestivum</i> var. Lok1           | KJ410481                                                                                                                                                                                                                                                 | Kaur et al.2016          |
|                                                       | <i>T. aestivum</i> ssp. <i>aestivum</i> var. NP4            | KJ410483                                                                                                                                                                                                                                                 | Kaur et al.2016          |
|                                                       | <i>T. aestivum</i> ssp. <i>aestivum</i> var. NP824          | KJ410484                                                                                                                                                                                                                                                 | Kaur et al.2016          |
|                                                       | <i>T. aestivum</i> ssp. <i>aestivum</i> var. VL404          | KJ410486                                                                                                                                                                                                                                                 | Kaur et al.2016          |
|                                                       | <i>T. aestivum</i> ssp. <i>aestivum</i> var. WG377          | KJ410487                                                                                                                                                                                                                                                 | Kaur et al.2016          |
|                                                       | <i>T. aestivum</i> ssp. <i>aestivum</i> var. WL711          | KJ410488                                                                                                                                                                                                                                                 | Kaur et al.2016          |
|                                                       | <i>T. aestivum</i> ssp. <i>aestivum</i> var. Zhengmai004    | KC715889, KC715890, KC715892, KC715896, KC715897, KC715901, KC715906, KC715907, KC715908, KC715910, KC715913, KC715917, KC715920, HM120221, HM120222                                                                                                     | Li et al. 2014           |
|                                                       | <i>T. aestivum</i> ssp. <i>aestivum</i> var. Yamhill        | K03074, K03075, K03076                                                                                                                                                                                                                                   | Sumner-Smith et al. 1985 |
|                                                       | <i>T. aestivum</i> ssp. <i>aestivum</i> var. Wyuna          | FN391140                                                                                                                                                                                                                                                 | Sander et al. 2011       |
|                                                       | <i>T. aestivum</i> ssp. <i>aestivum</i> var. Gaocheng 8901  | EF561274, EF561275, EF561276, EF561278, EF561279, EF561280                                                                                                                                                                                               | Xie et al. 2010          |
|                                                       | <i>T. aestivum</i> ssp. <i>aestivum</i> var. Zhongyou 9507  | EF561281, EF561283, EF561285, EF561287, EF561288                                                                                                                                                                                                         | Xie et al. 2010          |
|                                                       | <i>T. aestivum</i> ssp. <i>aestivum</i> var. AS1643         | DQ166376                                                                                                                                                                                                                                                 | Chen et al. 2005*        |
|                                                       | <i>T. aestivum</i> ssp. <i>aestivum</i> var. Jinan177       | EU018291, EU018292, EU018295, EU018296, EU018297, EU018298, EU018299                                                                                                                                                                                     | Chen et al. 2007*        |
|                                                       | <i>T. aestivum</i> ssp. <i>aestivum</i> var. Shaan253       | GQ891683, GQ891685                                                                                                                                                                                                                                       | Li et al. 2009*          |
|                                                       | <i>T. aestivum</i> ssp. <i>aestivum</i> var. Chinese Spring | JX141483, JX141484, JX141485, JX141486, JX141488, JX141489, JX141490, JX141492, JX141493, JX141494, JX141495                                                                                                                                             | Li et al. 2012*          |
|                                                       | <i>T. aestivum</i> ssp. <i>aestivum</i> var. Yumai50        | JX828260                                                                                                                                                                                                                                                 | Li et al. 2012*          |
|                                                       | <i>T. aestivum</i> ssp. <i>aestivum</i> var. Zhengfeng5     | JX828284, JX828286, JX828291, JX828292, JX828293, JX828296, JX828298, JX828299, JX828300, JX828304, JX828306, JX828307, JX828310                                                                                                                         | Li et al. 2012*          |
|                                                       | <i>T. aestivum</i> ssp. <i>aestivum</i> var. Zhengmai366    | JX828318                                                                                                                                                                                                                                                 | Li et al. 2012*          |
|                                                       | <i>T. aestivum</i> ssp. <i>aestivum</i>                     | DQ417343                                                                                                                                                                                                                                                 | Liu et al. 2006*         |
|                                                       | <i>T. aestivum</i> ssp. <i>aestivum</i> var. Chuannong 16   | DQ246446, DQ246447, DQ246448                                                                                                                                                                                                                             | Liu et al. 2005*         |
|                                                       | <i>T. aestivum</i> ssp. <i>aestivum</i> var. Chinese Spring | KJ137236, KJ137239, KJ137240, KJ137242, KJ137243                                                                                                                                                                                                         | Liu et al. 2014*         |
|                                                       | <i>T. aestivum</i> ssp. <i>aestivum</i> var. Chinese Spring | AB982235, AB982282, AB982291, AB982292, AB982294, AB982296, AB982298, AB982299                                                                                                                                                                           | Noma et al. 2015         |
|                                                       | <i>T. aestivum</i> ssp. <i>aestivum</i> var. Cheyenne       | M10092                                                                                                                                                                                                                                                   | Okita et al. 1985        |
|                                                       | <i>T. aestivum</i> ssp. <i>aestivum</i> var. Conil          | KP405248, KP405249, KP405252, KP405254, KP405255, KP405260, KP405261, KP405262, KP405263, KP405266, KP405267, KP405268, KP405269, KP405270, KP405271, KP405272, KP405273, KP405275, KP405276, KP405277, KP405278, KP405279, KP405280, KP405281, KP405282 | Ozuna et al. 2015        |
|                                                       | <i>T. aestivum</i> ssp. <i>aestivum</i>                     | X02538, X02539                                                                                                                                                                                                                                           | Sumner-Smith et al. 1985 |
|                                                       | <i>T. aestivum</i> ssp. <i>aestivum</i> var. 96-212-2       | EF165553, EF165556                                                                                                                                                                                                                                       | Tang et al. 2006*        |
| <i>T. aestivum</i> ssp. <i>aestivum</i> var. 96-132-1 | EF165554                                                    | Tang et al. 2006*                                                                                                                                                                                                                                        |                          |
| <i>T. aestivum</i> ssp. <i>aestivum</i> var. 96-137-3 | EF165555                                                    | Tang et al. 2006*                                                                                                                                                                                                                                        |                          |

## References :

\*: Direct submission

Anderson OD, Litts JC and Greene FC (1997) The a-gliadin gene family. I. Characterization of ten new wheat a-gliadin genomic clones, evidence for limited sequence conservation of flanking DNA, and Southern analysis of the gene family. *Theor Appl Genet* 95:50-58.  
doi: 10.1007/s001220050531

Arentz-Hansen EH, McAdam SN, Molberg O, Kristiansen C and Sollid LM (2000) Production of a panel of recombinant gliadins for the characterization of T cell reactivity in coeliac disease. *Gut* 46:46-51. doi: 10.1136/gut.46.1.46

- Garcia-Maroto F, Marana C, Garcia-Olmedo F and Carbonero P (1990) Nucleotide sequence of a cDNA encoding an  $\alpha/\beta$ -type gliadin from hexaploid wheat (*Triticum aestivum*). *Plant Mol Biol* 14:867-868. doi: 10.1007/BF00016521
- Kasarda DD, Okita TW, Bernardin JE, Baecker PA, Nimmo CC, Lew EJ-L, Dietler MD and Greene FC (1984) Nucleic acid (cDNA) and amino acid sequences of  $\alpha$ -type gliadins from wheat (*Triticum aestivum*). *Proc Natl Acad Sci USA* 81:4712-4716.
- Kaur A, Bains NS, Sood A, Yadav B, Sharma P, Kaur S, Garg M, Midha V and Chhuneja P (2016) Molecular characterization of  $\alpha$ -gliadin gene sequences in Indian wheat cultivars vis-à-vis celiac disease eliciting epitopes. *J Plant Biochem Biot*. doi: 10.1007/s13562-016-0367-5
- Li Y, Xin R, Zhang D and Li S (2014) Molecular characterization of  $\alpha$ -gliadin genes from common wheat cultivar Zhengmai 004 and their role in quality and celiac disease. *Crop J* 2:10-21. doi: 10.1016/j.cj.2013.11.003
- Noma S, Kawaura K, Hayakawa K, Abe C, Tsuge N and Ogiwara Y (2015) Comprehensive molecular characterization of the  $\alpha/\beta$ -gliadin multigene family in hexaploid wheat. *Mol Genet Genomics* 291:65-77. doi: 10.1007/s00438-015-1086-7
- Okita TW, Cheesbrough V and Reeves CD (1985) Evolution and heterogeneity of the  $\alpha/\beta$ -type and  $\gamma$ -type gliadin DNA sequences. *J Biol Chem* 260:8203-8213.
- Ozuna CV, Iehisa JCM, Gimenez MJ, Alvarez JB, Sousa C and Barro F (2015) Diversification of the celiac disease  $\alpha$ -gliadin complex in wheat: a 33-mer peptide with six overlapping epitopes, evolved following polyploidization. *Plant J* 82:794-805. doi: 10.1111/tpj.12851
- Sander I, Rozynek P, Rihs H-P, van Kampen V, Chew FT, Lee WS, Kotschy-Lang N, Merget R, Bruning T and Raulf-Heimsoth M (2011) Multiple wheat flour allergens and cross-reactive carbohydrate determinants bind IgE in baker's asthma. *Allergy* 66:1208-1215. doi: 10.1111/j.1398-9995.2011.02636.x
- Sumner-Smith M, Rafalski JA, Sugiyama T, Stoll M and Söll D (1985) Conservation and variability of wheat  $\alpha/\beta$ -gliadin genes. *Nucleic Acids Res* 13:3905-3916. doi: 10.1093/nar/13.11.3905
- Van Herpen TWJM, Goryunova SV, van der Schoot J, Mitreva M, Salentijn E, Vorst O, Schenk MF, van Veelen PA, Koning F, van Soest LJM, Vosman B, Bosch D, Hamer RJ, Gilissen LJWJ and Smulders MJM (2006) Alpha-gliadin genes from the A, B and D genomes of wheat contain different sets of celiac disease epitopes. *BMC Genomics* 7:1. doi: 10.1186/1471-2164-7-1
- Xie Z, Wang C, Wang K, Wang S, Li X, Zhang Z, Ma W and Yan Y (2010) Molecular characterization of the celiac disease epitope domains in  $\alpha$ -gliadin genes in *Aegilops tauschii* and hexaploid wheats (*Triticum aestivum* L.). *Theor Appl Genet* 121:1239-1251. doi: 10.1007/s00122-010-1384-8
