# Supplementary material for: Molecular diversity of α-gliadin expressed genes in genetically contrasted spelt (Triticum aestivum ssp. spelta) accessions and comparison with bread wheat (T. aestivum ssp. aestivum) and related diploid Triticum and Aegilops species
Source: PubMed Central journal article supplement (PMC5104789; doi:10.1007/s11032-016-0569-5), 2016-11-10

# Molecular diversity of $\alpha$ -gliadin expressed genes in genetically contrasted spelt (*Triticum aestivum* ssp. *spelta*) accessions and comparison with bread wheat (*T. aestivum* ssp. *aestivum*) and related diploid *Triticum* and *Aegilops* species

## Molecular Breeding

Benjamin Dubois<sup>1,2</sup>, Pierre Bertin<sup>2</sup>, Dominique Mingeot<sup>1</sup>

<sup>1</sup> Centre wallon de Recherches agronomiques (CRA-W), Département Sciences du vivant, Chaussée de Charleroi, 234, 5030 Gembloux, Belgium

<sup>2</sup> Université catholique de Louvain (UCL), Earth and Life Institute – Agronomy, Croix du Sud, 2 bte L7.05.11, 1348 Louvain-la-Neuve, Belgium

Corresponding author: Benjamin Dubois, b.dubois@cra.wallonie.be

Online Resource 3. Typical structure of an  $\alpha$ -gliadin. The four major T-cell stimulatory epitopes and their corresponding amino acid sequences are represented below the polypeptide model. 'C' indicates the classical location of the cysteine residues

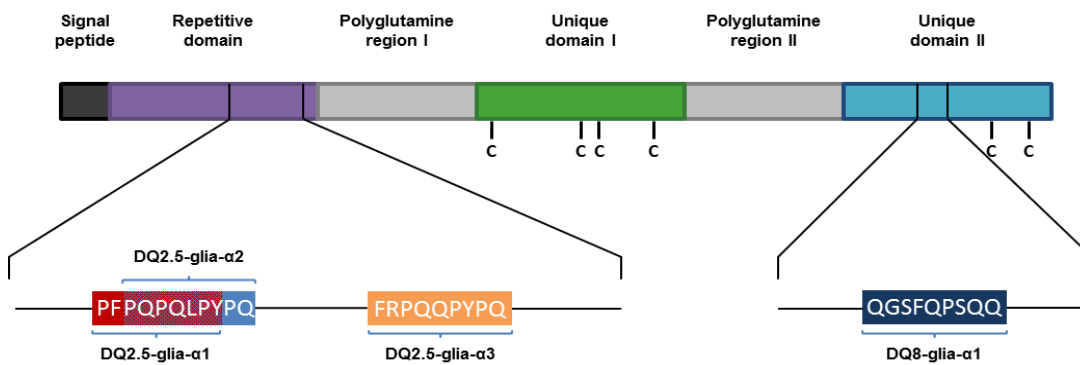

Supplement: 11032_2016_569_MOESM3_ESM.pdf [file 11032_2016_569_MOESM3_ESM.pdf]
