# Supplementary material for: Molecular diversity of α-gliadin expressed genes in genetically contrasted spelt (Triticum aestivum ssp. spelta) accessions and comparison with bread wheat (T. aestivum ssp. aestivum) and related diploid Triticum and Aegilops species
Source: PubMed Central journal article supplement (PMC5104789; doi:10.1007/s11032-016-0569-5), 2016-11-10

# Molecular diversity of $\alpha$ -gliadin expressed genes in genetically contrasted spelt (*Triticum aestivum* ssp. *spelta*) accessions and comparison with bread wheat (*T. aestivum* ssp. *aestivum*) and related diploid *Triticum* and *Aegilops* species

## Molecular Breeding

Benjamin Dubois<sup>1,2</sup>, Pierre Bertin<sup>2</sup>, Dominique Mingot<sup>1</sup>

<sup>1</sup> Centre wallon de Recherches agronomiques (CRA-W), Département Sciences du vivant, Chaussée de Charleroi, 234, 5030 Gembloux, Belgium

<sup>2</sup> Université catholique de Louvain (UCL), Earth and Life Institute – Agronomy, Croix du Sud, 2 bte L7.05.11, 1348 Louvain-la-Neuve, Belgium

Corresponding author: Benjamin Dubois, b.dubois@cra.wallonie.be

**Online Resource 4. Average number of glutamine residues in the first (PQI) and second (PQII) polyglutamine regions in 226  $\alpha$ -gliadin transcripts from 11 spelt accessions, according to the genome of origin (A, B and D). The PQI region overall had a higher average number of glutamine residues (16.8 +/- 4.1) than the PQII region (9.0 +/- 4.4). Alpha-gliadins from the A genome displayed a significantly higher average number of glutamine residues in the PQI region (19.3 +/- 3.1) than B (13.5 +/- 3.5) and D (14.6 +/- 2.9) genome sequences. For the PQII region, A genome sequences had a significantly lower average number of glutamine residues (6.9 +/- 0.5) than B (11.1 +/- 7.3) and D (11.6 +/- 2.2) genome  $\alpha$ -gliadins.**

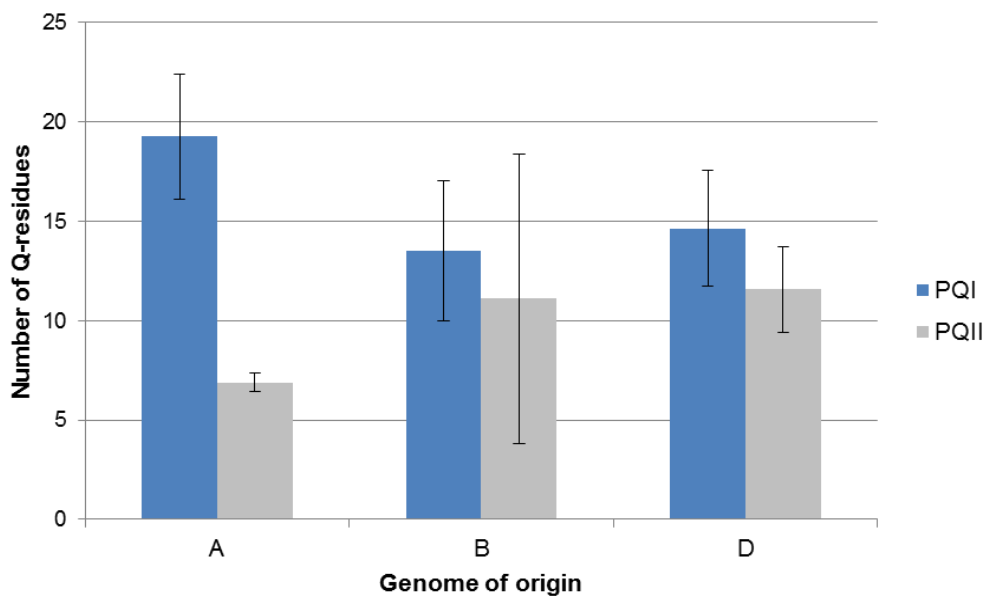

Supplement: 11032_2016_569_MOESM4_ESM.pdf [file 11032_2016_569_MOESM4_ESM.pdf]
