# Supplementary material for: Molecular diversity of α-gliadin expressed genes in genetically contrasted spelt (Triticum aestivum ssp. spelta) accessions and comparison with bread wheat (T. aestivum ssp. aestivum) and related diploid Triticum and Aegilops species
Source: PubMed Central journal article supplement (PMC5104789; doi:10.1007/s11032-016-0569-5), 2016-11-10
Supplement: 11032_2016_569_MOESM5_ESM.pdf [file 11032_2016_569_MOESM5_ESM.pdf]

# Molecular diversity of $\alpha$ -gliadin expressed genes in genetically contrasted spelt (*Triticum aestivum* ssp. *spelta*) accessions and comparison with bread wheat (*T. aestivum* ssp. *aestivum*) and related diploid *Triticum* and *Aegilops* species

## Molecular Breeding

Benjamin Dubois<sup>1,2</sup>, Pierre Bertin<sup>2</sup>, Dominique Mingot<sup>1</sup>

<sup>1</sup> Centre wallon de Recherches agronomiques (CRA-W), Département Sciences du vivant, Chaussée de Charleroi, 234, 5030 Gembloux, Belgium

<sup>2</sup> Université catholique de Louvain (UCL), Earth and Life Institute – Agronomy, Croix du Sud, 2 bte L7.05.11, 1348 Louvain-la-Neuve, Belgium

Corresponding author: Benjamin Dubois, b.dubois@cra.wallonie.be

### Online Resource 5. Variants of the DQ2.5-glia- $\alpha$ 1, - $\alpha$ 2, - $\alpha$ 3 and DQ8-glia- $\alpha$ 1 epitopes according to their genome of origin.

| Epitope                | Amino acid sequence | A genome | B genome | D genome | Total |
|------------------------|---------------------|----------|----------|----------|-------|
| DQ2.5-glia- $\alpha$ 1 | PFQPQLPY            | 150      | 0        | 104      | 254   |
|                        | PFQ-PQLPY           | 0        | 138      | 0        | 138   |
|                        | PYPQQLPY            | 0        | 0        | 51       | 51    |
|                        | PFSQQLPY            | 16       | 0        | 0        | 16    |
|                        | PFLQQLPY            | 16       | 0        | 0        | 16    |
|                        | PYPQHLPY            | 0        | 0        | 11       | 11    |
|                        | PFL-PQLPY           | 0        | 10       | 0        | 10    |
|                        | QFP-PQQPY           | 0        | 3        | 0        | 3     |
|                        | PFQPQLSY            | 1        | 0        | 0        | 1     |
|                        | PSP-PQLPY           | 0        | 1        | 0        | 1     |
|                        | PYPRPQLPY           | 0        | 0        | 1        | 1     |
|                        | Total               |          | 183      | 152      | 167   |
| DQ2.5-glia- $\alpha$ 2 | PQPQLPYPQ           | 0        | 0        | 157      | 157   |
|                        | P-PQLPYPQ           | 0        | 139      | 0        | 139   |
|                        | PQPQLPYSQ           | 123      | 0        | 0        | 123   |
|                        | PQPQLPYSH           | 27       | 0        | 0        | 27    |
|                        | SQPQLPYSQ           | 16       | 0        | 0        | 16    |
|                        | LQPQLPYSQ           | 16       | 0        | 0        | 16    |
|                        | PQPQLPYPQ           | 0        | 0        | 11       | 11    |
|                        | L-PQLPYPQ           | 0        | 8        | 0        | 8     |
|                        | P-PQQPYPQ           | 0        | 3        | 0        | 3     |
|                        | L-PQLPYPR           | 0        | 2        | 0        | 2     |
|                        | PQPQLPYPR           | 0        | 0        | 1        | 1     |
|                        | PRPQLPYPQ           | 0        | 0        | 1        | 1     |
|                        | PQPQLSYSQ           | 1        | 0        | 0        | 1     |
| Total                  |                     | 183      | 152      | 170      | 505   |
| DQ2.5-glia- $\alpha$ 3 | FRPQQPYPQ           | 173      | 0        | 93       | 266   |
|                        | FPPQQPYPQ           | 0        | 149      | 0        | 149   |
|                        | FRQQQPYPQ           | 60       | 0        | 0        | 60    |
|                        | FRPQQSYPQ           | 0        | 0        | 13       | 13    |
|                        | FRPQKPYPQ           | 4        | 0        | 0        | 4     |

|                      |                  |     |     |     |     |
|----------------------|------------------|-----|-----|-----|-----|
|                      | <b>SPPQQYPYQ</b> | 0   | 2   | 0   | 2   |
|                      | FQPQQYPYQ        | 1   | 0   | 0   | 1   |
|                      | FPPQQSYYPQ       | 0   | 1   | 0   | 1   |
|                      | Total            | 238 | 152 | 106 | 496 |
| DQ8-glia- $\alpha$ 1 | QGSFRPSQQ        | 176 | 2   | 2   | 180 |
|                      | QGSFQSSQQ        | 0   | 102 | 1   | 103 |
|                      | QGSFQPSQQ        | 6   | 7   | 48  | 61  |
|                      | QGFFQPSQQ        | 0   | 1   | 57  | 58  |
|                      | QVSFQPSQL        | 0   | 40  | 0   | 40  |
|                      | QGSFRPSQL        | 1   | 0   | 0   | 1   |
|                      | QGSFQPSQL        | 0   | 0   | 1   | 1   |
|                      | Total            | 183 | 152 | 109 | 444 |

Amino acid residues differing from the canonical epitope are highlighted in bold and deleted residues are represented by a dash.
